# Supplementary material for: Linear scaling relationships in homogeneous photoredox catalysis
Source: Royal Society of Chemistry journal article supplement (doi:10.1039/d4re00419a), 2024-01-01
Supplement: d4re00419a2.pdf [file d4re00419a2.pdf]

## Supporting Information

# Linear Scaling Relationships in Homogeneous Photoredox Catalysis

Kareesa J. Kron,<sup>a</sup> Shaama Mallikarjun Sharada,<sup>a,b</sup>

### 1 Charges as descriptors

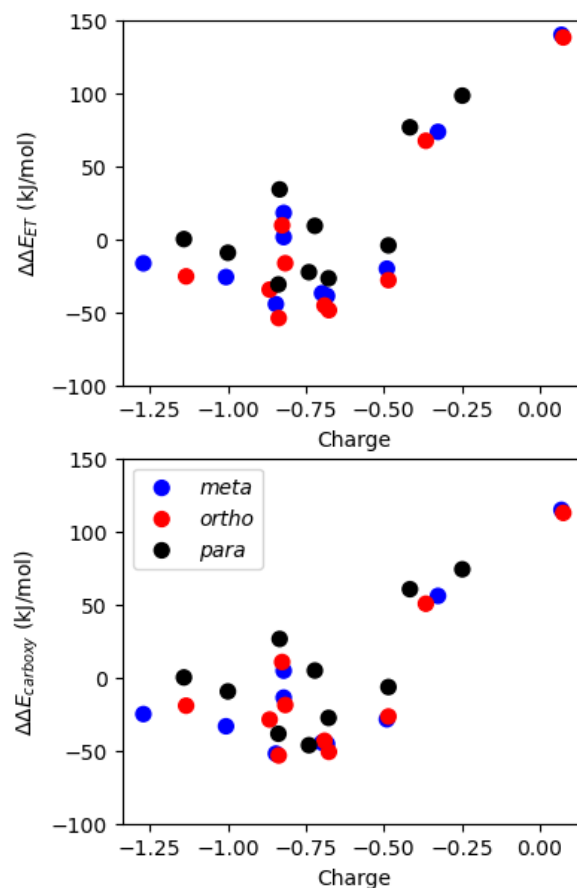

Figure S1: The correlations between either  $\Delta\Delta E_{ET}$  (top) or  $\Delta\Delta E_{carboxy}$  (bottom) and chromophore charge (excluding substituent) are weak.

### 2 Localized orbital bonding analysis

<sup>a</sup> Mork Family Department of Chemical Engineering and Materials Science, University of Southern California, Los Angeles CA 90089, USA.

<sup>b</sup> Department of Chemistry, University of Southern California, Los Angeles CA 90089, USA.

E-mail: ssharada@usc.edu

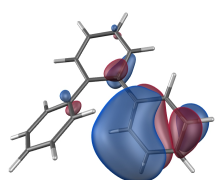

(a) H-substituted *o*- isomer

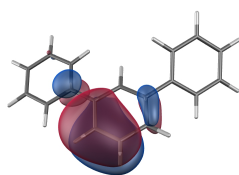

(b) H-substituted *m*- isomer

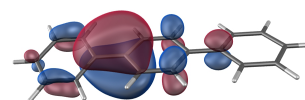

(c) H-substituted *p*- isomer

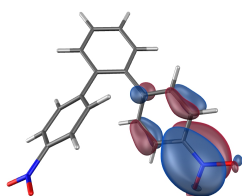

(d) NO<sub>2</sub>-substituted *o*- isomer

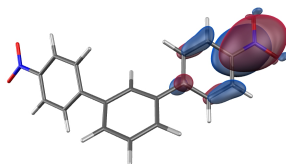

(e) NO<sub>2</sub>-substituted *m*- isomer

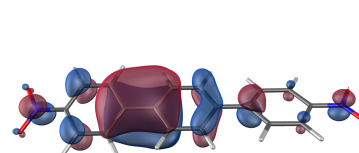

(f) NO<sub>2</sub>-substituted *p*- isomer

Figure S2: Comparing density associated with the unpaired electron obtained using LOBA (Pipek–Mezey localization and Löwdin population analysis) across H-substituted (top) and NO<sub>2</sub>-substituted isomers of terphenyl (isovalue = 0.05 Å<sup>3</sup>).
